# Supplementary material for: The Cytochrome P450 Epoxygenase Pathway Regulates the Hepatic Inflammatory Response in Fatty Liver Disease
Source: PubMed Central journal article supplement (PMC4195706; doi:10.1371/journal.pone.0110162), 2014-10-13
Supplement: pone.0110162.s005.pdf [file pone.0110162.s005.pdf]

**Table S3. Correlation between hepatic mRNA levels of CYP epoxygenases and mediators of the innate immune inflammatory response in mice.**

|              | <i>Cyp2c29</i> | <i>Cyp2c50</i> | <i>Cyp2c55</i> | <i>Cyp2j5</i> |
|--------------|----------------|----------------|----------------|---------------|
| <i>Tlr4</i>  | -0.63 (0.035)  | -0.62 (0.043)  | -0.69 (0.019)  | -0.86 (0.001) |
| <i>Nfkb1</i> | -0.75 (0.007)  | -0.74 (0.010)  | -0.65 (0.029)  | -0.59 (0.056) |
| <i>Tnfa</i>  | -0.70 (0.017)  | -0.63 (0.039)  | -0.75 (0.007)  | -0.69 (0.019) |

Data presented as Spearman correlation coefficient (p-value).
