# Supplementary material for: The Cytochrome P450 Epoxygenase Pathway Regulates the Hepatic Inflammatory Response in Fatty Liver Disease
Source: PubMed Central journal article supplement (PMC4195706; doi:10.1371/journal.pone.0110162), 2014-10-13
Supplement: pone.0110162.s006.pdf [file pone.0110162.s006.pdf]

**Table S4. Effects of atherogenic diet and *Ephx2* disruption on circulating and hepatic EET levels by regioisomer.**

| <b>Eicosanoid</b>                                   | <b>Standard Diet<br/><i>Wild-Type</i></b> | <b>Atherogenic Diet<br/><i>Wild-Type</i></b> | <b>Atherogenic Diet<br/><i>Ephx2</i><sup>-/-</sup></b> |
|-----------------------------------------------------|-------------------------------------------|----------------------------------------------|--------------------------------------------------------|
| <b><u>Plasma</u></b>                                |                                           |                                              |                                                        |
| <b><i>EET:DHET ratios</i></b>                       |                                           |                                              |                                                        |
| 8,9-EET:DHET                                        | 0.19 ± 0.07                               | 0.06 ± 0.01                                  | 0.46 ± 0.08 *                                          |
| 11,12-EET:DHET                                      | 0.10 ± 0.05                               | 0.04 ± 0.01                                  | 0.24 ± 0.08 *                                          |
| 14,15-EET:DHET                                      | <i>See Figure 5A</i>                      |                                              |                                                        |
| <b><i>EET regioisomers (ng/mL)</i></b>              |                                           |                                              |                                                        |
| 8,9-EET                                             | 0.26 ± 0.05 *                             | 0.12 ± 0.02                                  | 0.29 ± 0.04 *                                          |
| 11,12-EET                                           | 0.18 ± 0.06                               | 0.09 ± 0.01                                  | 0.17 ± 0.04 *                                          |
| 14,15-EET                                           | 0.49 ± 0.04                               | 0.31 ± 0.04                                  | 0.93 ± 0.12 *                                          |
| Sum EETs                                            | <i>See Figure 5B</i>                      |                                              |                                                        |
| <b><u>Liver</u></b>                                 |                                           |                                              |                                                        |
| <b><i>EET:DHET ratios</i></b>                       |                                           |                                              |                                                        |
| 8,9-EET:DHET                                        | 0.32 ± 0.05                               | 0.15 ± 0.02                                  | 0.55 ± 0.13 *                                          |
| 11,12-EET:DHET                                      | 0.10 ± 0.01                               | 0.08 ± 0.04                                  | 0.10 ± 0.02                                            |
| 14,15-EET:DHET                                      | <i>See Figure 5C</i>                      |                                              |                                                        |
| <b><i>EET regioisomers (ng/g tissue)</i></b>        |                                           |                                              |                                                        |
| 8,9-EET                                             | 2.47 ± 0.58 *                             | 1.07 ± 0.09                                  | 3.24 ± 0.30 *                                          |
| 11,12-EET                                           | 2.56 ± 0.46                               | 2.40 ± 1.00                                  | 3.38 ± 0.85                                            |
| 14,15-EET                                           | 20.3 ± 1.66 *                             | 14.0 ± 0.90                                  | 34.0 ± 5.93 *                                          |
| Sum EETs                                            | <i>See Figure 5D</i>                      |                                              |                                                        |
| <b><i>CYP epoxygenase expression (relative)</i></b> |                                           |                                              |                                                        |
| <i>Cyp2j5</i>                                       | 1.00 ± 0.08 *                             | 0.64 ± 0.08                                  | 0.72 ± 0.10                                            |
| <i>Cyp2c50</i>                                      | 1.00 ± 0.08 *                             | 0.44 ± 0.07                                  | 0.53 ± 0.10                                            |
| <i>Cyp2c29</i>                                      | <i>See Figure 5E</i>                      |                                              |                                                        |

Plasma (n=10-19 per group) and liver (n=3-5 per group) eicosanoids and liver CYP epoxygenase expression (n=8 per group) were quantified in wild-type (WT) mice fed the standard diet and WT and *Ephx2*<sup>-/-</sup> mice fed the atherogenic diet.

Data presented as mean ± SEM.

\*P<0.05 versus WT-atherogenic diet group
